# Supplementary material for: Entanglement-assisted Reed–Solomon codes over qudits: theory and architecture
Source: Springer Nature journal article supplement (doi:10.1007/s11128-021-03028-w), 2021-04-01
Supplement: MOESM1 [file 11128_2021_3028_MOESM1_ESM.pdf]

## Supplementary Online Material

In this Supplementary material, for an EA RS code constructed from two  $[n, n - d_m + 1, d_m]$ -classical RS codes with parity check matrices  $H_{b_1}$  and  $H_{b_2}$ , we obtain the set  $P_O$  for various cases of  $u$  and  $v$ , where  $v = (b_1 + b_2 - 2) \bmod n$  and  $u = v + 2(d_m - 1)$ .

The ranges of  $i$  and  $j$  such that  $(v + i + j) \bmod n = 0$  for various cases<sup>1</sup> based on  $u$  and  $v$  are provided in Table 1.

Table 1: Ranges of  $i$  and  $j$  satisfying  $(v + i + j) \bmod n = 0$ .

| Case      | Range of $u$ and $v$                 | Range of $i$ and $j$                                                                                                 |
|-----------|--------------------------------------|----------------------------------------------------------------------------------------------------------------------|
| Case 1    | $u < n$                              | -                                                                                                                    |
| Case 2(a) | $n \leq u < 2n$ and $n - v < d_m$    | $i \in \{1, \dots, n - v - 1\}, j = n - v - i_m$                                                                     |
| Case 2(b) | $n \leq u < 2n$ and $n - v \geq d_m$ | $i \in \{n - v - (d_m - 1), \dots, d_m - 1\}, j = n - v - i_m$                                                       |
| Case 3    | $2n \leq u < 3n$                     | $i \in \{1, \dots, n - v - 1\}, j = n - v - i_m$<br>$i \in \{2n - v - (d_m - 1), \dots, d_m - 1\}, j = 2n - v - i_m$ |

We recall that the position index sets are

$$P_X = \{n - b_1 - d_m + 3, \dots, n - b_1 + 1\}, \quad (1)$$

$$P_Z = \{b_2 + 1, \dots, b_2 + d_m - 1\}, \quad (2)$$

$$P_O = P_X \cap P_Z. \quad (3)$$

From equation (1), when an element  $s$  belongs to  $P_X$ ,  $s$  satisfies the following inequality:

$$\begin{aligned} n - b_1 - d_m + 3 &\leq s \leq n - b_1 + 1, \\ \Rightarrow n - (b_1 - 2 + (d_m - 1)) &\leq s \leq n - (b_1 - 2 + 1). \end{aligned}$$

Thus, the general form of an element  $s$  that belongs to  $P_X$  is

$$s = n - (b_1 - 2 + i), \text{ where } i \in \{1, \dots, (d_m - 1)\}. \quad (4)$$

From equation (2), when an element  $t$  belongs to  $P_Z$ ,  $t$  satisfies the following inequality:

$$\begin{aligned} b_2 + 1 &\leq t \leq b_2 + d_m - 1, \\ \Rightarrow b_2 + 1 &\leq t \leq b_2 + (d_m - 1). \end{aligned}$$

Thus, the general form of an element  $t$  that belongs to  $P_Z$  is

$$b_2 + j, \text{ where } j \in \{1, \dots, (d_m - 1)\}. \quad (5)$$

We note that the value of  $s$  and  $t$  in equations (4) and (5) are considered modulo  $n$  and belong to the range 1 to  $n$ .

We next consider an element  $r$  that belongs to  $P_O$  from equation (3). As  $P_O = P_X \cap P_Z$ , the element  $r$  belongs to both  $P_X$  and  $P_Z$ . Thus, from equations (4) and (5), for some  $i, j \in \{1, \dots, (d_m - 1)\}$ , we obtain

$$\begin{aligned} r &= n - (b_1 - 2 + i) \text{ and } r = b_2 + j, \\ \Rightarrow r &= n - (b_1 - 2 + i) = b_2 + j, \\ \Rightarrow (b_1 + b_2 - 2) + i + j &= n. \end{aligned} \quad (6)$$

As the general form of the elements of  $P_X$  and  $P_Z$  in equations (4) and (5) are considered modulo  $n$ ,  $r = (n - (b_1 - 2 + i))$  and  $r = (b_2 + j)$  are also considered modulo  $n$ . As  $v = (b_1 + b_2 - 2) \bmod n$ , the equation (6) is same as the condition  $(v + i + j) \bmod n = 0$  obtained in the paper to find the value of  $n_e$ . Thus,  $i$  and  $j$  in equation (6) belong to the ranges in Table 1 that was obtained using the condition  $(v + i + j) \bmod n = 0$ .

We note that the elements in the set  $P_O$  are modulo  $n$  and range from 1 to  $n$ . We next obtain the set  $P_O$  for the various cases in Table 1 by obtaining the range of  $r$  based on the ranges of  $i$

and  $j$  as follows:

**Case 1:**

As  $n_e = 0$ , there are no entangled qudits, and also there are no overlaps from Table 1. Thus,  $P_O = \emptyset$ .

**Case 2(a):**

From Table 1, the range of  $i$  and  $j$  is from 1 to  $(n - v - 1)$ . In equation (4), considering  $v = (b_1 + b_2 - 2) \bmod n$  and the range of  $i$  to be from 1 to  $(n - v - 1)$ , we obtain that  $r$  satisfies the following inequality:

$$\begin{aligned} n - (b_1 - 2 + (n - v - 1)) &\leq r \leq n - b_1 + 1, \\ n - (b_1 - 2 + (n - (b_1 + b_2 - 2) - 1)) &\leq r \leq n - b_1 + 1, \\ \Rightarrow b_2 + 1 &\leq r \leq n - b_1 + 1. \end{aligned} \tag{7}$$

In equation (5), considering  $v = (b_1 + b_2 - 2) \bmod n$  and the range of  $j$  to be from 1 to  $(n - v - 1)$ , we obtain that  $r$  satisfies the following inequality:

$$\begin{aligned} b_2 + 1 &\leq r \leq b_2 + (n - v - 1), \\ b_2 + 1 &\leq r \leq b_2 + (n - (b_1 + b_2 - 2) - 1), \\ \Rightarrow b_2 + 1 &\leq r \leq n - b_1 + 1. \end{aligned} \tag{8}$$

From equations (7) and (8), the element  $r$  that belongs to both the sets  $P_X$  and  $P_Z$  also belongs to the range from  $(b_2 + 1)$  to  $(n - b_1 + 1)$ . Thus,  $P_O = \{b_2 + 1, \dots, n - b_1 + 1\}$ .

**Case 2(b):**

From Table 1, the range of  $i$  and  $j$  is from  $(n - v - (d_m - 1))$  to  $(d_m - 1)$ . In equation (4), considering  $v = (b_1 + b_2 - 2) \bmod n$  and the range of  $i$  to be from  $(n - v - (d_m - 1))$  to

$(d_m - 1)$ , we obtain that  $r$  satisfies the following inequality:

$$\begin{aligned}
n - (b_1 - 2 + (d_m - 1)) &\leq r \leq n - (b_1 - 2 + (n - v - (d_m - 1))), \\
n - (b_1 - 2 + (d_m - 1)) &\leq r \leq n - (b_1 - 2 + (n - (b_1 + b_2 - 2) - (d_m - 1))), \\
\Rightarrow n - d_m - b_1 + 3 &\leq r \leq b_2 + d_m - 1.
\end{aligned} \tag{9}$$

In equation (5), considering  $v = (b_1 + b_2 - 2) \bmod n$  and the range of  $j$  to be from  $(n - v - (d_m - 1))$  to  $(d_m - 1)$ , we obtain that  $r$  satisfies the following inequality:

$$\begin{aligned}
b_2 + (n - v - (d_m - 1)) &\leq r \leq b_2 + (d_m - 1), \\
b_2 + (n - (b_1 + b_2 - 2) - (d_m - 1)) &\leq r \leq b_2 + (d_m - 1), \\
\Rightarrow n - d_m - b_1 + 3 &\leq r \leq b_2 + d_m - 1.
\end{aligned} \tag{10}$$

From equations (9) and (10), the element  $r$  that belongs to both the sets  $P_X$  and  $P_Z$  also belongs to the range from  $(n - d_m - b_1 + 3)$  to  $(b_2 + d_m - 1)$ . Thus,  $P_O = \{n - d_m - b_1 + 3, \dots, b_2 + d_m - 1\}$ .

### **Case 3:**

From Table 1, there are two ranges of  $i$  and  $j$  as follows:

- 1) The first range of  $i$  and  $j$  is from 1 to  $n - v - 1$ . In equation (4), considering  $v = (b_1 + b_2 - 2) \bmod n$  and the range of  $i$  to be from 1 to  $n - v - 1$ , we obtain that  $r$  satisfies the following inequality:

$$\begin{aligned}
n - (b_1 - 2 + n - v - 1) &\leq r \leq n - b_1 + 1, \\
n - (b_1 - 2 + n - (b_1 + b_2 - 2) - 1) &\leq r \leq n - b_1 + 1, \\
\Rightarrow b_2 + 1 &\leq r \leq n - b_1 + 1.
\end{aligned} \tag{11}$$

In equation (5), considering  $v = (b_1 + b_2 - 2) \bmod n$  and the range of  $j$  to be from 1 to

$n - v - 1$ , we obtain that  $r$  satisfies the following inequality:

$$\begin{aligned}
b_2 + 1 &\leq r \leq b_2 + n - v - 1, \\
b_2 + 1 &\leq r \leq b_2 + n - (b_1 + b_2 - 2) - 1, \\
\Rightarrow b_2 + 1 &\leq r \leq n - b_1 + 1.
\end{aligned} \tag{12}$$

From equations (11) and (12), the element  $r$  that belongs to both sets  $P_X$  and  $P_Z$  also belongs to the range from  $(b_2 + 1)$  to  $(n - b_1 + 1)$ . Thus,

$$\{b_2 + 1, \dots, n - b_1 + 1\} \subset P_O. \tag{13}$$

2) The second range of  $i$  and  $j$  is from  $(2n - v - (d_m - 1))$  to  $(d_m - 1)$ . In equation (4), considering  $v = (b_1 + b_2 - 2) \bmod n$  and the range of  $i$  to be from  $(2n - v - (d_m - 1))$  to  $(d_m - 1)$ , we obtain that  $r$  satisfies the following inequality:

$$\begin{aligned}
n - (b_1 - 2 + (d_m - 1)) &\leq r \leq n - (b_1 - 2 + (2n - v - (d_m - 1))), \\
n - (b_1 - 2 + (d_m - 1)) &\leq r \leq n - (b_1 - 2 + 2n - (b_1 + b_2 - 2) - (d_m - 1)), \\
\Rightarrow n - d_m - b_1 + 3 &\leq r \leq b_2 + d_m - 1,
\end{aligned} \tag{14}$$

In equation (5), considering  $v = (b_1 + b_2 - 2) \bmod n$  and the range of  $j$  to be from  $(2n - v - (d_m - 1))$  to  $(d_m - 1)$ , we obtain that  $r$  satisfies the following inequality:

$$\begin{aligned}
b_2 + (2n - v - (d_m - 1)) &\leq r \leq b_2 + (d_m - 1), \\
b_2 + 2n - (b_1 + b_2 - 2) - (d_m - 1) &\leq r \leq b_2 + d_m - 1, \\
\Rightarrow 2n - d_m - b_1 + 3 &\leq r \leq b_2 + d_m - 1, \\
\Rightarrow n - d_m - b_1 + 3 &\leq r \leq b_2 + d_m - 1,
\end{aligned} \tag{15}$$

where  $(n - d_m - b_1 + 3)$  is obtained from  $(2n - d_m - b_1 + 3)$  by considering modulo  $n$  as the element  $r \in P_O$  is considered modulo  $n$ .

From equation (14) and (15), the element  $r$  that belongs to both the sets  $P_X$  and  $P_Z$  also belongs to the range from  $(n - d_m - b_1 + 3)$  to  $(b_2 + d_m - 1)$ . Thus,

$$\{n - d_m - b_1 + 3, \dots, b_2 + d_m - 1\} \subset P_O. \quad (16)$$

Thus, for Case 3, from equations (13) and (16), the set  $P_O = \{b_2 + 1, \dots, n - b_1 + 1, n - d_m - b_1 + 3, \dots, b_2 + d_m - 1\}$ .

## References and Notes

- [1] Nadkarni, P. J., Garani, S. S.: Entanglement-Assisted Quantum Reed-Solomon Codes. IEEE Information Theory Applications Workshop, San Diego (2019).
